# Supplementary material for: An E-selectin targeting and MMP-2-responsive dextran–curcumin polymeric prodrug for targeted therapy of acute kidney injury
Source: Royal Society of Chemistry journal article supplement (doi:10.1039/c8bm00813b), 2018-01-01
Supplement: c8bm00813b1.pdf [file c8bm00813b1.pdf]

## Supplementary data

E-selectin-targeting, inflammatory microenvironment-responsive  
dextran-curcumin polymeric prodrug for acute kidney injury

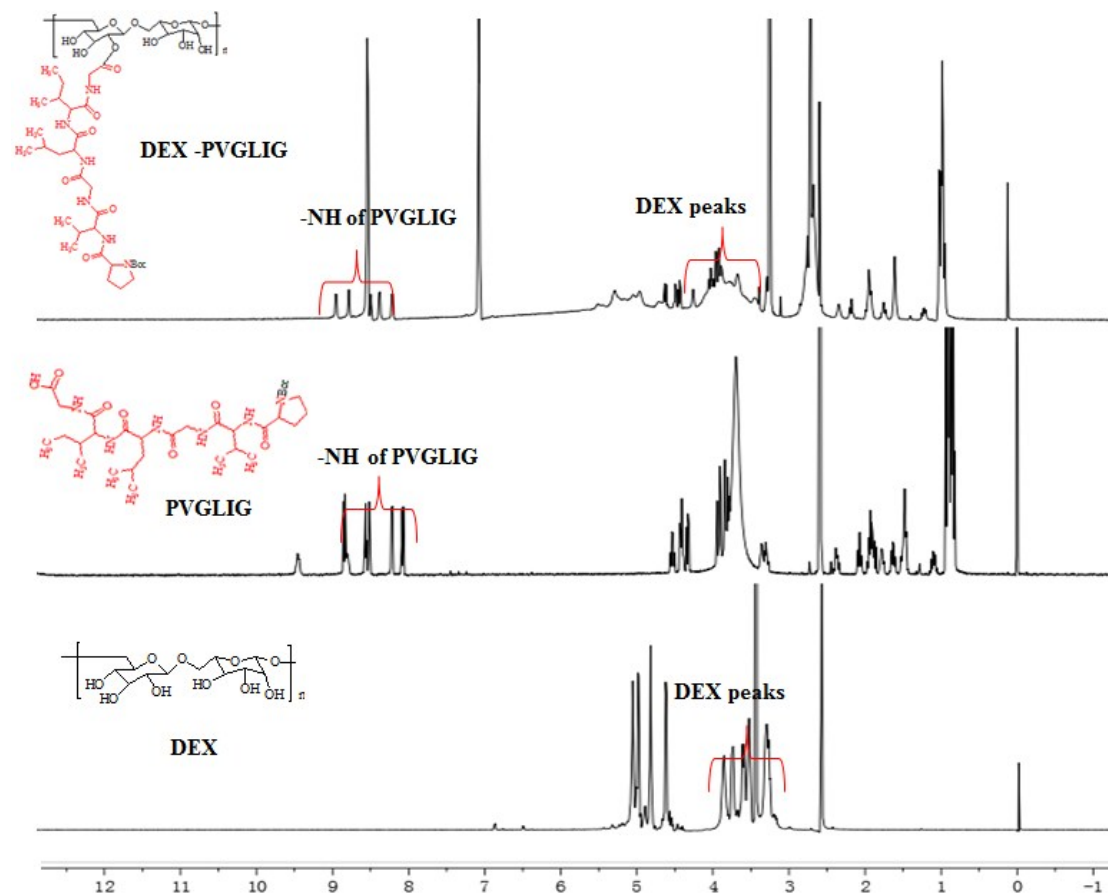

Figure S1. Characterization of DEX-PVGLIG.

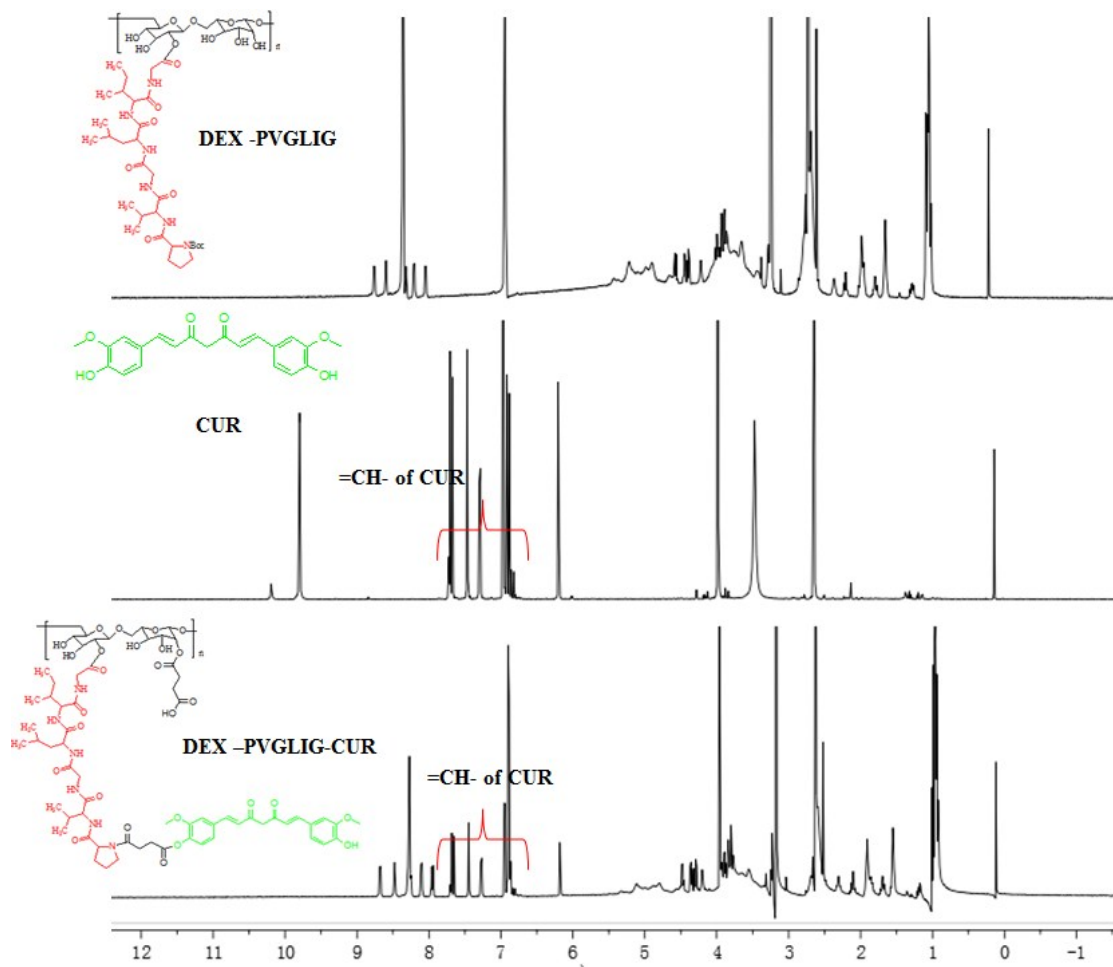

Figure S2. Characterization of DEX-PVGLIG-CUR.

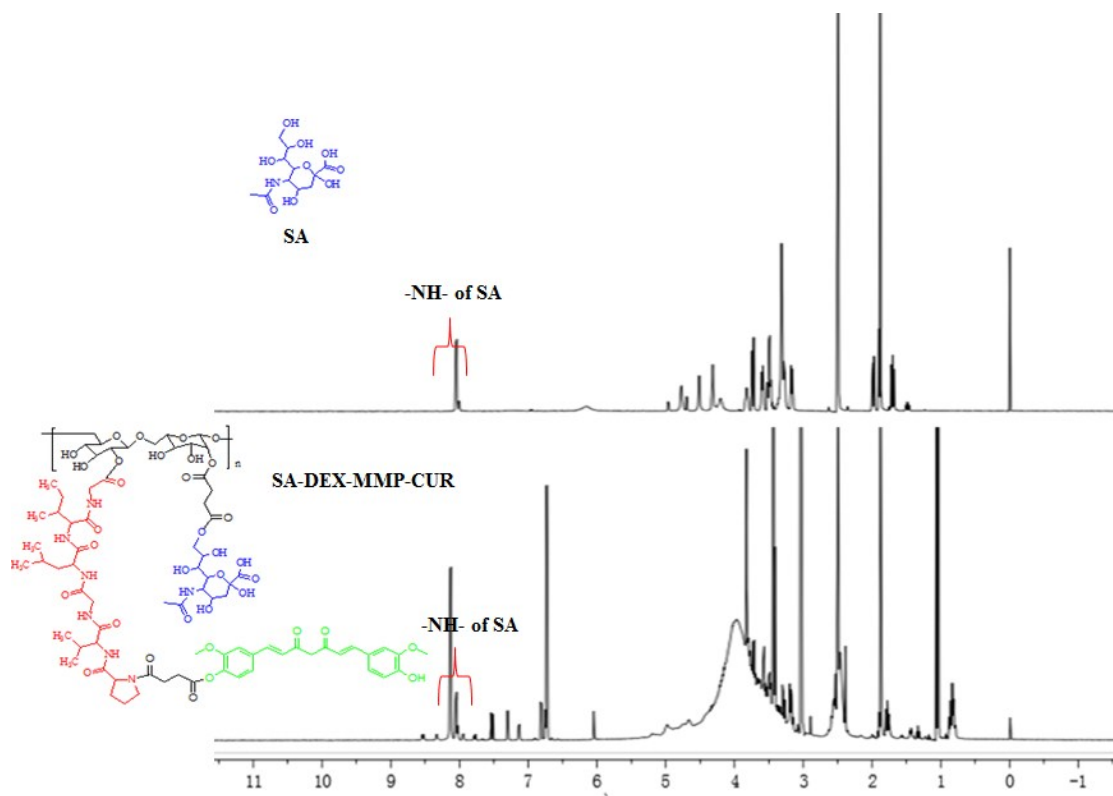

Figure S3. Characterization of SA-DEX-PVGLIG-CUR.

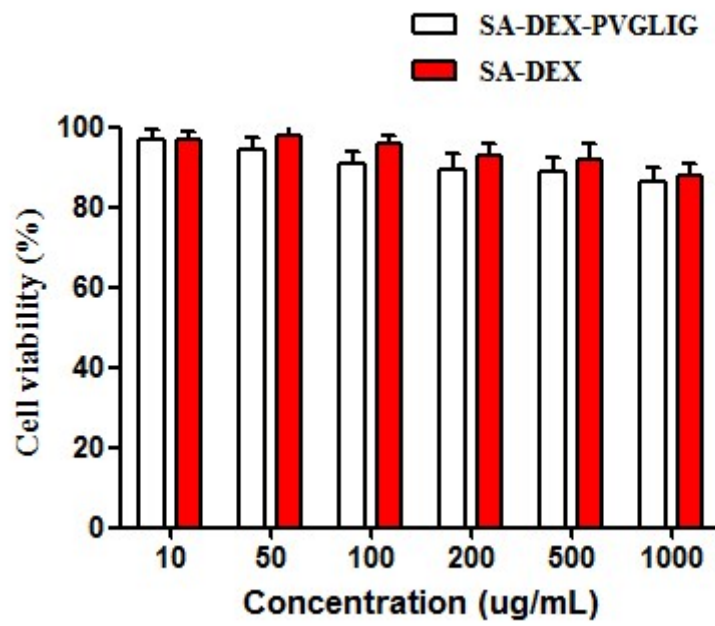

Figure S4. Cell survival of HUVECs incubated with different concentration of SA-DEX-PVGLIG for 48 h, SA-DEX as control. Data were presented as mean  $\pm$  SD ( $n = 3$ ).
